# Supplementary material
Source: PubMed Central journal article supplement (PMC3203765)
Supplement: 1103824108_pnas.201103824SI.pdf [file 1103824108_pnas.201103824SI.pdf]

# Supporting Information

Wu et al. 10.1073/pnas.1103824108

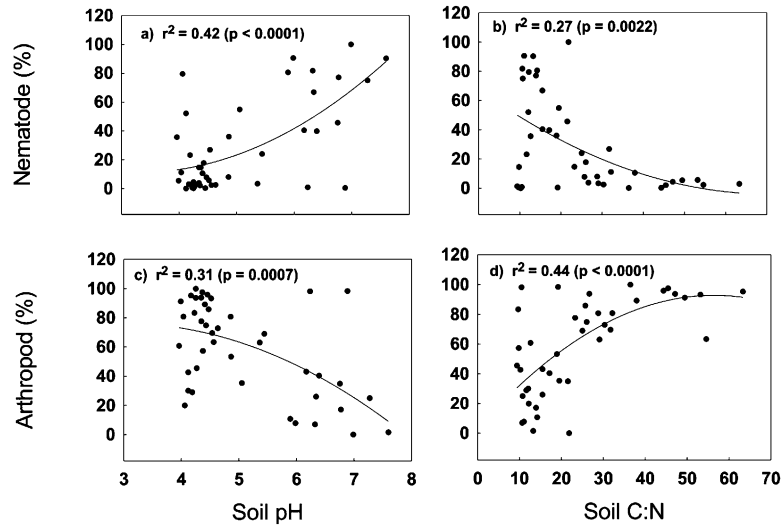

**Fig. S1.** Correlation between (A) nematode proportion at each plot and soil pH, (B) nematode proportion and soil C:N ratio, (C) arthropod proportion and soil pH, and (D) arthropod proportion and soil C:N ratio ( $n = 42$ ).

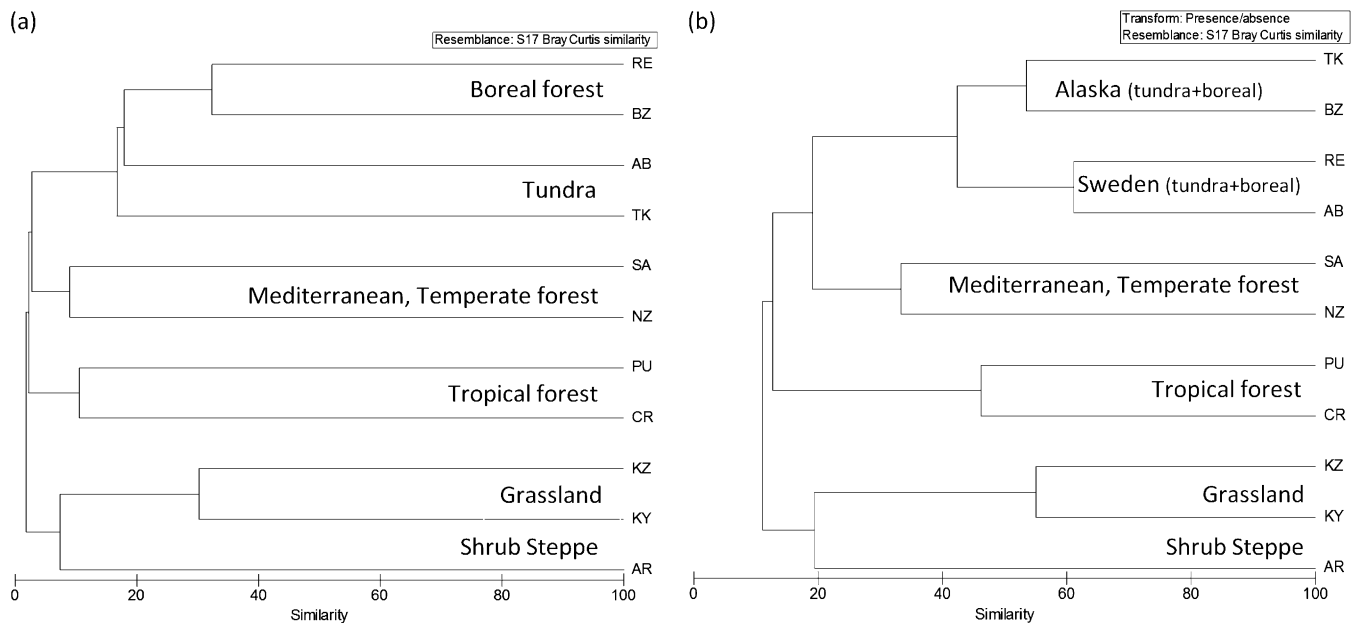

**Fig. S2.** Cluster analysis of OTUs observed at 2 or more of 11 locations on the basis of (A) abundance of OTUs and (B) presence/absence of OTUs.

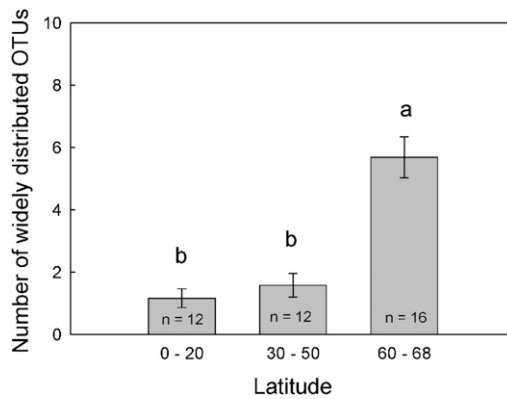

**Fig. S3.** OTUs observed at four or more locations from three different latitude ranges. Vertical bars represent  $\pm$  SE. Letters above each bar (A and B) indicate that means are significantly different ( $P < 0.05$ ) from each other.

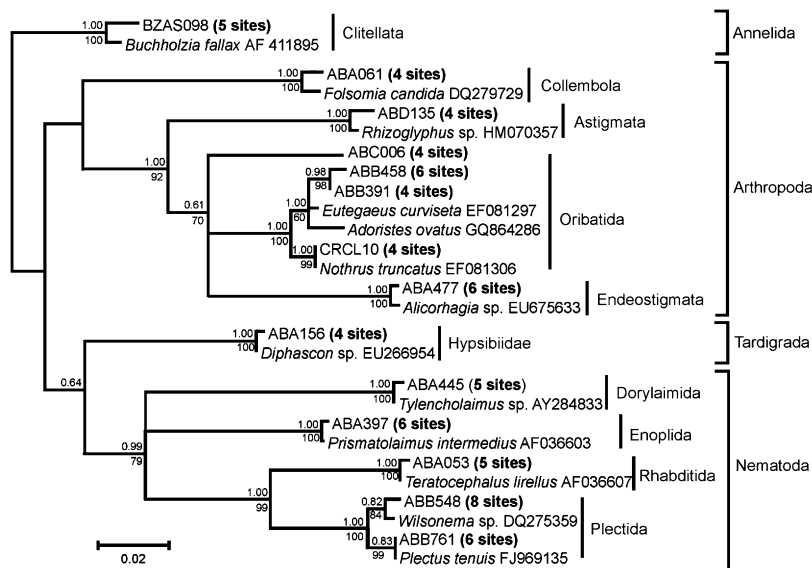

**Fig. S4.** Phylogenetic tree of the 14 most widely distributed OTUs demonstrating GenBank identification of small soil animals. The number above each node represents posterior probabilities from a Bayesian analysis (1). The number below each node represents bootstrap values from a distance analysis using maximum composite likelihood (2). GenBank entries are identified by the species name and GenBank identifier. Locations from the present study are identified by a unique number and the number of locations at which they were found. (Scale, the number of substitutions per site from the distance analysis.)

- Ronquist F, Huelsenbeck JP (2003) MrBayes 3: Bayesian phylogenetic inference under mixed models. *Bioinformatics* 19:1572–1574.
- Tamura K, Dudley J, Nei M, Kumar S (2007) MEGA4: Molecular Evolutionary Genetics Analysis (MEGA) software version 4.0. *Mol Biol Evol* 24:1596–1599.



**Table S2. T-test comparisons of each environmental parameter (mean  $\pm$  SE) between arthropod- and nematode-dominated locations**

| Environmental parameters                                   | Locations dominated by arthropods<br>(six locations, 24 plots) | Locations dominated by nematodes<br>(four locations, 14 plots)* | P value | Site dominated by<br>both (TK plots) |
|------------------------------------------------------------|----------------------------------------------------------------|-----------------------------------------------------------------|---------|--------------------------------------|
| Latitude                                                   | 48 $\pm$ 21                                                    | 21 $\pm$ 19                                                     | <0.01   | 68 $\pm$ 0                           |
| Mean annual temperature ( $^{\circ}$ C)                    | 9.5 $\pm$ 11.4                                                 | 18.5 $\pm$ 6.8                                                  | 0.01    | -6.9 $\pm$ 0.0                       |
| Mean annual precipitation (mm)                             | 1031 $\pm$ 924                                                 | 1781 $\pm$ 1716                                                 | 0.09    | 322 $\pm$ 0                          |
| Soil temperature ( $^{\circ}$ C) average                   | 12.7 $\pm$ 6.9                                                 | 23.7 $\pm$ 3.5                                                  | <0.01   | 5.1 $\pm$ 1.0                        |
| Respiration average (g CO <sub>2</sub> /m <sup>2</sup> /h) | 0.62 $\pm$ 0.5                                                 | 0.67 $\pm$ 0.4                                                  | 0.74    | 0.38 $\pm$ 0.08                      |
| Litter average (g/m <sup>2</sup> )                         | 405 $\pm$ 217                                                  | 202 $\pm$ 236                                                   | 0.01    | 229 $\pm$ 14                         |
| Root biomass (mg/g soil)                                   | 120 $\pm$ 193                                                  | 6 $\pm$ 7                                                       | 0.03    | 59 $\pm$ 80                          |
| Soil bulk density (g/cm <sup>3</sup> )                     | 0.67 $\pm$ 0.40                                                | 1.39 $\pm$ 0.20                                                 | 0.00    | 0.63 $\pm$ 0.40                      |
| Soil moisture (%)                                          | 85 $\pm$ 62                                                    | 41 $\pm$ 27                                                     | 0.02    | 102 $\pm$ 38                         |
| Soil pH                                                    | 4.5 $\pm$ 0.6                                                  | 5.9 $\pm$ 1.3                                                   | <0.01   | 5.6 $\pm$ 0.8                        |
| Soil EC (microsiemen)                                      | 60 $\pm$ 40                                                    | 62 $\pm$ 41                                                     | 0.92    | 25 $\pm$ 14                          |
| Soil C%                                                    | 11 $\pm$ 11                                                    | 3 $\pm$ 2                                                       | 0.01    | 6 $\pm$ 4                            |
| Soil N%                                                    | 0.42 $\pm$ 0.42                                                | 0.29 $\pm$ 0.19                                                 | 0.28    | 0.4 $\pm$ 0.2                        |
| Soil C:N                                                   | 32 $\pm$ 15                                                    | 14 $\pm$ 3                                                      | <0.01   | 18 $\pm$ 2                           |
| Microbial C ( $\mu$ g/g)                                   | 951 $\pm$ 1324                                                 | 350 $\pm$ 221                                                   | 0.10    | 255 $\pm$ 120                        |
| Microbial N ( $\mu$ g/g)                                   | 132 $\pm$ 186                                                  | 58 $\pm$ 41                                                     | 0.15    | 43 $\pm$ 19                          |
| Soil NO <sub>3</sub> ( $\mu$ g/g)                          | 4.8 $\pm$ 6.5                                                  | 23.6 $\pm$ 33.1                                                 | 0.01    | 6.1 $\pm$ 1.9                        |
| Soil NH <sub>4</sub> ( $\mu$ g/g)                          | 5.0 $\pm$ 4.9                                                  | 12.1 $\pm$ 16.6                                                 | 0.06    | 0.9 $\pm$ 0.3                        |
| Soil inorganic N ( $\mu$ g/g)                              | 9.8 $\pm$ 9.7                                                  | 35.7 $\pm$ 47.9                                                 | 0.01    | 7.0 $\pm$ 2.2                        |

\*There were four replicate plots at each location except one, which had only two plots.

Bold values are statistically significant.

**Table S3. Comparison of the average number of OTUs common to 4 or more locations, OTUs observed at only one site, and singletons within the 42 plots representing all 11 locations ( $n = 4$  if not otherwise indicated)**

| Location | Number of OTUs common to 4<br>or more locations | Number of OTUs found at a single location or found only once |                              |
|----------|-------------------------------------------------|--------------------------------------------------------------|------------------------------|
|          |                                                 | OTUs at 1 location                                           | Singleton                    |
| AB       | 4.0 $\pm$ 1.5 <sup>a,b</sup>                    | 59.8 $\pm$ 7.8                                               | 51.5 $\pm$ 7.3               |
| TK       | 5.5 $\pm$ 1.0 <sup>a</sup>                      | 65.8 $\pm$ 11.7                                              | 52.3 $\pm$ 10.5              |
| RE       | 6.8 $\pm$ 1.8 <sup>a</sup>                      | 51.3 $\pm$ 3.2                                               | 38.5 $\pm$ 2.9               |
| BZ       | 6.5 $\pm$ 0.9 <sup>a</sup>                      | 62.8 $\pm$ 4.8                                               | 51.3 $\pm$ 5.6               |
| KZ       | 1.5 $\pm$ 0.3 <sup>b,c</sup>                    | 59.5 $\pm$ 22.2                                              | 47.0 $\pm$ 20.1              |
| CR       | 0.8 $\pm$ 0.5 <sup>c</sup>                      | 57.5 $\pm$ 27.8                                              | 47.3 $\pm$ 24.4              |
| KY       | 1.8 $\pm$ 0.5 <sup>b,c</sup>                    | 82.0 $\pm$ 6.8                                               | 59.8 $\pm$ 5.9               |
| PU       | 1.0 $\pm$ 0.6 <sup>c</sup>                      | 34.8 $\pm$ 8.5                                               | 23.8 $\pm$ 7.9               |
| SA       | 1.0 $\pm$ 0.7 <sup>c</sup>                      | 45.3 $\pm$ 7.2                                               | 39.3 $\pm$ 7.2               |
| NZ       | 2.3 $\pm$ 0.9 <sup>b,c</sup>                    | 37.3 $\pm$ 12.8                                              | 24.3 $\pm$ 9.9               |
| AR       | 1.0 $\pm$ 0.0 <sup>*,c</sup>                    | 20.5 $\pm$ 12.5 <sup>*</sup>                                 | 17.0 $\pm$ 12.0 <sup>*</sup> |
| P value  | <0.01                                           | 0.26                                                         | 0.37                         |

Values with different superscript letters (a,b, and c) are statistically different from each other.

\*Sequences were only obtained from two plots.
